# Supplementary material for: Antidepressive and BDNF effects of enriched environment treatment across ages in mice lacking BDNF expression through promoter IV
Source: PubMed Central journal article supplement (PMC5048201; doi:10.1038/tp.2016.160), 2016-09-20
Supplement: tp2016160x1.pdf [file tp2016160x1.pdf]

## Supplementary Information

1. Supplementary Table 1.
2. Supplementary Fig. 1
3. Figure legends for supplementary Fig. 1

**Supplementary Fig. 1. Effects of enriched environment treatment (EET) on distance moved in the open field test across ages (male: left; female: right).** **a.** Distance moved in WT and KIV mice after 2 months of EET (SCT and EET, T<sub>1</sub>), then after 1 month of SCT (SCT-SCT and EET-SCT, T<sub>2</sub>). Asterisks on the columns show a significant difference between WT and KIV mice. **b.** EET effects shown as % SCT across ages at T<sub>1</sub> (top) and at T<sub>2</sub> (bottom). Asterisks on the columns show a significant effect of EET compared to SCT. ED, early-life development; YA, young adult; OA, old adult. \*P<0.05, \*\*P<0.01, \*\*\*P<0.005. N=10–16 (shown at the columns).
