# Supplementary material for: Antidepressive and BDNF effects of enriched environment treatment across ages in mice lacking BDNF expression through promoter IV
Source: PubMed Central journal article supplement (PMC5048201; doi:10.1038/tp.2016.160), 2016-09-20
Supplement: tp2016160x2.pdf [file tp2016160x2.pdf]

## Supplementary Table 1. Statistical Analysis

### 1. Two-way ANOVA: Genotype and age effects.

| Fig. 1b-e<br>Effects of<br>promoter IV-<br>BDNF deficiency<br>across ages |     |                     | Genotype<br>Effects                          | Age<br>Effects                       | Genotype<br>X Age<br>Interactio<br>ns | Test 2 hoc Bonferroni Test<br>Genotype Effects |                               |                               | Test 2 hoc Bonferroni Test<br>Aging Effects |                               |                               |
|---------------------------------------------------------------------------|-----|---------------------|----------------------------------------------|--------------------------------------|---------------------------------------|------------------------------------------------|-------------------------------|-------------------------------|---------------------------------------------|-------------------------------|-------------------------------|
|                                                                           |     |                     |                                              |                                      |                                       | ED                                             | YA                            | OA                            | ED vs. YA                                   | ED vs. OA                     | YA vs. OA                     |
|                                                                           |     |                     |                                              |                                      |                                       |                                                |                               |                               |                                             |                               |                               |
| Male                                                                      | OFT | Total<br>Activity   | $F_{(1,84)} =$<br><b>54.9</b><br>$P < 0.001$ | $F_{(2,84)} =$<br>2.6<br>$P = 0.08$  | $F_{(2,84)} =$<br>2.6<br>$P = 0.08$   | $T_{30} = 5.5$<br>$P < 0.001$                  | $T_{25} = 4.7$<br>$P < 0.001$ | $T_{29} = 2.5$<br>$P < 0.05$  | $T_{27} = 5.5$<br>$P > 0.05$                | $T_{30} = 3.0$<br>$P < 0.05$  | $T_{30} = 2.5$<br>$P > 0.05$  |
|                                                                           |     | Distance<br>Moved   | $F_{(1,86)} =$<br>3.7<br>$P = 0.06$          | $F_{(2,86)} =$<br>0.25<br>$P = 0.78$ | $F_{(2,86)} =$<br>0.25<br>$P = 0.78$  | $T_{30} = 1.3$<br>$P > 0.05$                   | $T_{26} = 1.5$<br>$P > 0.05$  | $T_{30} = 0.6$<br>$P > 0.05$  | $T_{28} = 0.3$<br>$P > 0.05$                | $T_{30} = 0.7$<br>$P > 0.05$  | $T_{30} = 1.0$<br>$P > 0.05$  |
|                                                                           |     | Time in<br>Center   | $F_{(1,82)} =$<br>3.3<br>$P = 0.07$          | $F_{(2,82)} =$<br>0.90<br>$P = 0.41$ | $F_{(2,82)} =$<br>0.93<br>$P = 0.40$  | $T_{30} =$<br>0.02<br>$P > 0.05$               | $T_{25} = 1.8$<br>$P > 0.05$  | $T_{29} = 1.3$<br>$P > 0.05$  | $T_{26} = 1.9$<br>$P > 0.05$                | $T_{30} = 1.2$<br>$P > 0.05$  | $T_{30} = 0.73$<br>$P > 0.05$ |
|                                                                           | TST | Immobi<br>lity Time | $F_{(1,77)} =$<br><b>39.0</b><br>$P < 0.001$ | $F_{(2,77)} =$<br>1.1<br>$P = 0.32$  | $F_{(2,77)} =$<br>1.2<br>$P = 0.32$   | $T_{30} = 4.4$<br>$P < 0.001$                  | $T_{25} = 3.5$<br>$P < 0.01$  | $T_{29} = 2.8$<br>$P < 0.05$  | $T_{24} = 1.2$<br>$P > 0.05$                | $T_{26} = 2.1$<br>$P > 0.05$  | $T_{26} = 0.92$<br>$P > 0.05$ |
| Female                                                                    | OFT | Total<br>Activity   | $F_{(1,86)} =$<br><b>70.8</b><br>$P < 0.001$ | $F_{(2,86)} =$<br>0.52<br>$P = 0.59$ | $F_{(2,86)} =$<br>0.50<br>$P = 0.61$  | $T_{30} = 5.1$<br>$P < 0.001$                  | $T_{28} = 5.4$<br>$P < 0.001$ | $T_{28} = 4.0$<br>$P < 0.001$ | $T_{29} = 0.48$<br>$P > 0.05$               | $T_{29} = 0.54$<br>$P > 0.05$ | $T_{29} = 1.0$<br>$P > 0.05$  |
|                                                                           |     | Distance<br>Moved   | $F_{(1,90)} =$<br><b>29.8</b><br>$P < 0.001$ | $F_{(2,90)} =$<br>1.1<br>$P = 0.35$  | $F_{(2,90)} =$<br>1.1<br>$P = 0.35$   | $T_{30} = 4.3$<br>$P < 0.001$                  | $T_{30} = 2.4$<br>$P > 0.05$  | $T_{30} = 2.8$<br>$P < 0.05$  | $T_{30} = 2.0$<br>$P > 0.05$                | $T_{30} = 1.5$<br>$P > 0.05$  | $T_{30} = 0.41$<br>$P > 0.05$ |
|                                                                           |     | Time in<br>Center   | $F_{(1,88)} =$<br><b>11.5</b><br>$P < 0.001$ | $F_{(2,88)} =$<br>0.76<br>$P = 0.47$ | $F_{(2,88)} =$<br>0.76<br>$P = 0.47$  | $T_{30} = 1.7$<br>$P > 0.05$                   | $T_{25} = 1.2$<br>$P > 0.05$  | $T_{29} = 3.0$<br>$P < 0.05$  | $T_{28} = 0.39$<br>$P > 0.05$               | $T_{29} = 1.3$<br>$P > 0.05$  | $T_{29} = 1.6$<br>$P > 0.05$  |
|                                                                           | TST | Immobi<br>lity Time | $F_{(1,89)} =$<br><b>37.1</b><br>$P < 0.001$ | $F_{(2,89)} =$<br>1.2<br>$P = 0.30$  | $F_{(2,89)} =$<br>1.2<br>$P = 0.30$   | $T_{30} = 3.0$<br>$P < 0.01$                   | $T_{25} = 4.8$<br>$P < 0.001$ | $T_{29} = 2.7$<br>$P < 0.05$  | $T_{30} = 1.8$<br>$P > 0.05$                | $T_{29} = 0.28$<br>$P > 0.05$ | $T_{29} = 2.0$<br>$P > 0.05$  |

## 2. Two-way ANOVA: Genotype and EET effects.

| Fig. 2a<br>OFT<br>Total Activity |                          |    | Genotype Effects                         | Treatment Effects                        | Genotype X Treatment Interactions      | Test 2 hoc Bonferroni Test<br>Genotype Effects (WT vs KIV) |                                     | Test 2 hoc Bonferroni Test<br>Treatment Effects (SCT vs EET) |                                   |
|----------------------------------|--------------------------|----|------------------------------------------|------------------------------------------|----------------------------------------|------------------------------------------------------------|-------------------------------------|--------------------------------------------------------------|-----------------------------------|
|                                  |                          |    |                                          |                                          |                                        | SCT                                                        | EET                                 | WT                                                           | KIV                               |
| Male                             | Test 1 (T <sub>1</sub> ) | ED | F <sub>(1,58)</sub> = 36.4<br>P < 0.0001 | F <sub>(1,58)</sub> = 28.0<br>P < 0.0001 | F <sub>(1,58)</sub> = 1.1<br>P = 0.29  | T <sub>30</sub> = 3.6<br>P < 0.01                          | T <sub>28</sub> = 4.9<br>P < 0.0001 | T <sub>28</sub> = 4.4<br>P < 0.0001                          | T <sub>30</sub> = 3.0<br>P < 0.01 |
|                                  |                          | YA | F <sub>(1,51)</sub> = 42.8<br>P < 0.0001 | F <sub>(1,51)</sub> = 16.8<br>P < 0.0001 | F <sub>(1,51)</sub> = 0.16<br>P = 0.69 | T <sub>25</sub> = 4.3<br>P < 0.001                         | T <sub>26</sub> = 5.0<br>P < 0.0001 | T <sub>26</sub> = 3.2<br>P < 0.01                            | T <sub>25</sub> = 2.6<br>P < 0.05 |
|                                  |                          | OA | F <sub>(1,59)</sub> = 38.9<br>P < 0.0001 | F <sub>(1,59)</sub> = 1.1<br>P = 0.431   | F <sub>(1,59)</sub> = 6.8<br>P < 0.05  | T <sub>29</sub> = 2.5<br>P < 0.05                          | T <sub>30</sub> = 6.3<br>P < 0.0001 | T <sub>29</sub> = 2.6<br>P < 0.05                            | T <sub>30</sub> = 1.1<br>P > 0.05 |
|                                  | Test 2 (T <sub>2</sub> ) | ED | F <sub>(1,58)</sub> = 49.1<br>P < 0.0001 | F <sub>(1,58)</sub> = 19.5<br>P < 0.0001 | F <sub>(1,58)</sub> = 1.1<br>P = 0.30  | T <sub>30</sub> = 4.3<br>P < 0.001                         | T <sub>28</sub> = 5.6<br>P < 0.0001 | T <sub>28</sub> = 3.8<br>P < 0.001                           | T <sub>30</sub> = 2.4<br>P < 0.05 |
|                                  |                          | YA | F <sub>(1,44)</sub> = 28.7<br>P < 0.0001 | F <sub>(1,44)</sub> = 10.3<br>P < 0.005  | F <sub>(1,44)</sub> = 2.1<br>P = 0.15  | T <sub>24</sub> = 2.9<br>P < 0.05                          | T <sub>20</sub> = 4.6<br>P < 0.0001 | T <sub>21</sub> = 3.2<br>P < 0.01                            | T <sub>23</sub> = 1.3<br>P > 0.05 |
|                                  |                          | OA | F <sub>(1,60)</sub> = 40.3<br>P < 0.0001 | F <sub>(1,60)</sub> = 0.48<br>P = 0.49   | F <sub>(1,60)</sub> = 5.0<br>P < 0.05  | T <sub>30</sub> = 3.3<br>P < 0.01                          | T <sub>30</sub> = 5.2<br>P < 0.0001 | T <sub>30</sub> = 1.4<br>P > 0.05                            | T <sub>30</sub> = 0.5<br>P > 0.05 |

|        |                          |    |                                          |                                          |                                        |                                    |                                     |                                    |                                   |
|--------|--------------------------|----|------------------------------------------|------------------------------------------|----------------------------------------|------------------------------------|-------------------------------------|------------------------------------|-----------------------------------|
| Female | Test 1 (T <sub>1</sub> ) | ED | F <sub>(1,58)</sub> = 12.4<br>P < 0.001  | F <sub>(1,58)</sub> = 17.9<br>P < 0.0001 | F <sub>(1,58)</sub> = 0.4<br>P = 0.53  | T <sub>30</sub> = 3.0<br>P < 0.01  | T <sub>28</sub> = 2.0<br>P > 0.05   | T <sub>29</sub> = 2.5<br>P < 0.05  | T <sub>29</sub> = 3.4<br>P < 0.01 |
|        |                          | YA | F <sub>(1,56)</sub> = 32.4<br>P < 0.0001 | F <sub>(1,56)</sub> = 13.9<br>P < 0.0005 | F <sub>(1,56)</sub> = 0.01<br>P = 0.91 | T <sub>28</sub> = 4.2<br>P < 0.001 | T <sub>28</sub> = 4.8<br>P < 0.0001 | T <sub>28</sub> = 2.7<br>P < 0.05  | T <sub>28</sub> = 2.6<br>P < 0.05 |
|        |                          | OA | F <sub>(1,60)</sub> = 55.1<br>P < 0.0001 | F <sub>(1,60)</sub> = 14.0<br>P < 0.001  | F <sub>(1,60)</sub> = 3.4<br>P = 0.07  | T <sub>30</sub> = 4.0<br>P < 0.001 | T <sub>30</sub> = 6.5<br>P < 0.0001 | T <sub>30</sub> = 3.9<br>P < 0.001 | T <sub>30</sub> = 1.4<br>P > 0.05 |
|        | Test 2 (T <sub>2</sub> ) | ED | F <sub>(1,57)</sub> = 6.5<br>P < 0.05    | F <sub>(1,57)</sub> = 1.6<br>P = 0.22    | F <sub>(1,57)</sub> = 4.1<br>P < 0.05  | T <sub>30</sub> = 3.3<br>P < 0.01  | T <sub>27</sub> = 0.4<br>P > 0.05   | T <sub>28</sub> = 0.5<br>P > 0.05  | T <sub>29</sub> = 2.3<br>P < 0.05 |
|        |                          | YA | F <sub>(1,56)</sub> = 30.8<br>P < 0.0001 | F <sub>(1,56)</sub> = 15.3<br>P < 0.001  | F <sub>(1,56)</sub> < 0.01<br>P = 0.96 | T <sub>28</sub> = 4.0<br>P < 0.001 | T <sub>28</sub> = 3.9<br>P < 0.001  | T <sub>28</sub> = 2.7<br>P < 0.05  | T <sub>28</sub> = 2.8<br>P < 0.05 |
|        |                          | OA | F <sub>(1,60)</sub> = 19.9<br>P < 0.0001 | F <sub>(1,60)</sub> = 3.3<br>P = 0.08    | F <sub>(1,60)</sub> = 0.02<br>P = 0.90 | T <sub>30</sub> = 3.1<br>P < 0.01  | T <sub>30</sub> = 3.2<br>P < 0.01   | T <sub>30</sub> = 1.4<br>P > 0.05  | T <sub>30</sub> = 1.2<br>P > 0.05 |

| Fig. 3a<br>OFT<br>Time in Center |                          |    | Genotype Effects                        | Treatment Effects                       | Genotype X Treatment Interactions      | Test 2 hoc Bonferroni Test<br>Genotype Effects (WT vs KIV) |                                    | Test 2 hoc Bonferroni Test<br>Treatment Effects (SCT vs EET) |                                    |
|----------------------------------|--------------------------|----|-----------------------------------------|-----------------------------------------|----------------------------------------|------------------------------------------------------------|------------------------------------|--------------------------------------------------------------|------------------------------------|
|                                  |                          |    |                                         |                                         |                                        | SCT                                                        | EET                                | WT                                                           | KIV                                |
| Male                             | Test 1 (T <sub>1</sub> ) | ED | F <sub>(1,58)</sub> = 0.04<br>P = 0.83  | F <sub>(1,58)</sub> = 13.9<br>P < 0.001 | F <sub>(1,58)</sub> = 0.03<br>P = 0.87 | T <sub>30</sub> = 0.03<br>P > 0.05                         | T <sub>28</sub> = 0.26<br>P > 0.05 | T <sub>28</sub> = 2.7<br>P < 0.05                            | T <sub>30</sub> = 2.6<br>P < 0.05  |
|                                  |                          | YA | F <sub>(1,44)</sub> = 6.4<br>P < 0.05   | F <sub>(1,44)</sub> = 5.0<br>P < 0.05   | F <sub>(1,44)</sub> = 1.5<br>P = 0.22  | T <sub>22</sub> = 0.93<br>P > 0.05                         | T <sub>22</sub> = 2.7<br>P < 0.05  | T <sub>22</sub> = 2.5<br>P < 0.05                            | T <sub>22</sub> = 0.72<br>P > 0.05 |
|                                  |                          | OA | F <sub>(1,60)</sub> = 11.1<br>P < 0.001 | F <sub>(1,60)</sub> = 5.8<br>P < 0.01   | F <sub>(1,60)</sub> = 3.4<br>P = 0.070 | T <sub>30</sub> = 1.1<br>P > 0.05                          | T <sub>30</sub> = 3.7<br>P < 0.01  | T <sub>30</sub> = 3.0<br>P < 0.01                            | T <sub>30</sub> = 0.39<br>P > 0.05 |
|                                  | Test 2 (T <sub>2</sub> ) | ED | F <sub>(1,56)</sub> = 3.2<br>P = 0.08   | F <sub>(1,56)</sub> = 2.1<br>P = 0.16   | F <sub>(1,56)</sub> = 6.0<br>P < 0.05  | T <sub>28</sub> = 0.5<br>P > 0.05                          | T <sub>28</sub> = 3.0<br>P < 0.01  | T <sub>28</sub> = 2.7<br>P < 0.05                            | T <sub>28</sub> = 0.7<br>P > 0.05  |
|                                  |                          | YA | F <sub>(1,44)</sub> = 5.2<br>P < 0.05   | F <sub>(1,40)</sub> = 0.04<br>P = 0.85  | F <sub>(1,40)</sub> = 0.01<br>P = 0.99 | T <sub>22</sub> = 1.7<br>P > 0.05                          | T <sub>18</sub> = 1.6<br>P > 0.05  | T <sub>20</sub> = 0.15<br>P > 0.05                           | T <sub>20</sub> = 0.13<br>P > 0.05 |
|                                  |                          | OA | F <sub>(1,60)</sub> = 10.1<br>P < 0.01  | F <sub>(1,60)</sub> = 0.20<br>P = 0.65  | F <sub>(1,60)</sub> = 1.0<br>P = 0.32  | T <sub>30</sub> = 1.6<br>P > 0.05                          | T <sub>29</sub> = 3.4<br>P < 0.01  | T <sub>29</sub> = 0.39<br>P > 0.05                           | T <sub>30</sub> = 1.0<br>P > 0.05  |

|        |                          |    |                                          |                                        |                                        |                                    |                                     |                                    |                                    |
|--------|--------------------------|----|------------------------------------------|----------------------------------------|----------------------------------------|------------------------------------|-------------------------------------|------------------------------------|------------------------------------|
| Female | Test 1 (T <sub>1</sub> ) | ED | F <sub>(1,60)</sub> < 0.01<br>P = 0.95   | F <sub>(1,60)</sub> = 5.3<br>P < 0.05  | F <sub>(1,60)</sub> = 4.7<br>P < 0.05  | T <sub>30</sub> = 1.5<br>P > 0.05  | T <sub>30</sub> = 1.6<br>P > 0.05   | T <sub>30</sub> = 0.1<br>P > 0.05  | T <sub>30</sub> = 3.2<br>P < 0.01  |
|        |                          | YA | F <sub>(1,60)</sub> = 3.2<br>P = 0.08    | F <sub>(1,60)</sub> = 0.08<br>P = 0.78 | F <sub>(1,60)</sub> = 2.6<br>P = 0.11  | T <sub>30</sub> = 0.12<br>P > 0.05 | T <sub>30</sub> = 2.4<br>P < 0.05   | T <sub>30</sub> = 0.94<br>P > 0.05 | T <sub>30</sub> = 1.3<br>P > 0.05  |
|        |                          | OA | F <sub>(1,60)</sub> = 30.2<br>P < 0.0001 | F <sub>(1,60)</sub> = 5.2<br>P < 0.05  | F <sub>(1,60)</sub> = 3.6<br>P = 0.065 | T <sub>30</sub> = 2.6<br>P < 0.05  | T <sub>30</sub> = 5.2<br>P < 0.0001 | T <sub>30</sub> = 2.9<br>P < 0.01  | T <sub>30</sub> = 0.28<br>P > 0.05 |
|        | Test 2 (T <sub>2</sub> ) | ED | F <sub>(1,56)</sub> = 1.4<br>P = 0.24    | F <sub>(1,56)</sub> = 2.2<br>P = 0.14  | F <sub>(1,56)</sub> = 0.19<br>P = 0.66 | T <sub>30</sub> = 1.2<br>P > 0.05  | T <sub>26</sub> = 0.5<br>P > 0.05   | T <sub>26</sub> = 1.3<br>P > 0.05  | T <sub>30</sub> = 0.8<br>P > 0.05  |
|        |                          | YA | F <sub>(1,60)</sub> = 7.5<br>P < 0.01    | F <sub>(1,60)</sub> = 0.18<br>P = 0.68 | F <sub>(1,60)</sub> = 1.9<br>P = 0.18  | T <sub>30</sub> = 0.97<br>P > 0.05 | T <sub>30</sub> = 2.9<br>P < 0.05   | T <sub>30</sub> = 0.67<br>P > 0.05 | T <sub>30</sub> = 1.3<br>P > 0.05  |
|        |                          | OA | F <sub>(1,60)</sub> = 9.9<br>P < 0.005   | F <sub>(1,60)</sub> = 0.43<br>P = 0.52 | F <sub>(1,60)</sub> = 0.09<br>P = 0.77 | T <sub>30</sub> = 2.0<br>P > 0.05  | T <sub>30</sub> = 2.4<br>P < 0.05   | T <sub>30</sub> = 0.25<br>P > 0.05 | T <sub>30</sub> = 0.67<br>P > 0.05 |

| Fig. 4a<br>TST<br>Immobility Time |                          |    | Genotype Effects                                         | Treatment Effects                                        | Genotype X Treatment Interactions                      | Test 2 hoc Bonferroni Test Genotype Effects (WT vs KIV) |                                                     | Test 2 hoc Bonferroni Test Treatment Effects (SCT vs EET) |                                                     |
|-----------------------------------|--------------------------|----|----------------------------------------------------------|----------------------------------------------------------|--------------------------------------------------------|---------------------------------------------------------|-----------------------------------------------------|-----------------------------------------------------------|-----------------------------------------------------|
|                                   |                          |    |                                                          |                                                          |                                                        | SCT                                                     | EET                                                 | WT                                                        | KIV                                                 |
|                                   |                          |    |                                                          |                                                          |                                                        |                                                         |                                                     |                                                           |                                                     |
| Male                              | Test 1 (T <sub>1</sub> ) | ED | <b>F<sub>(1,44)</sub> = 7.6</b><br><b>P &lt; 0.01</b>    | <b>F<sub>(1,44)</sub> = 46.1</b><br><b>P &lt; 0.0001</b> | <b>F<sub>(1,44)</sub> = 8.1</b><br><b>P &lt; 0.01</b>  | <b>T<sub>22</sub> = 4.0</b><br><b>P &lt; 0.001</b>      | T <sub>22</sub> = 0.1<br>P > 0.05                   | <b>T<sub>22</sub> = 2.8</b><br><b>P &lt; 0.05</b>         | <b>T<sub>22</sub> = 6.8</b><br><b>P &lt; 0.0001</b> |
|                                   |                          | YA | <b>F<sub>(1,49)</sub> = 21.2</b><br><b>P &lt; 0.0001</b> | <b>F<sub>(1,49)</sub> = 17.5</b><br><b>P &lt; 0.0001</b> | F <sub>(1,49)</sub> = 0.01<br>P = 0.91                 | <b>T<sub>25</sub> = 3.1</b><br><b>P &lt; 0.01</b>       | <b>T<sub>26</sub> = 3.3</b><br><b>P &lt; 0.01</b>   | <b>T<sub>25</sub> = 3.1</b><br><b>P &lt; 0.01</b>         | <b>T<sub>26</sub> = 2.9</b><br><b>P &lt; 0.05</b>   |
|                                   |                          | OA | <b>F<sub>(1,60)</sub> = 24.1</b><br><b>P &lt; 0.0001</b> | F <sub>(1,60)</sub> = 3.9<br>P = 0.05                    | F <sub>(1,60)</sub> = 2.0<br>P = 0.17                  | <b>T<sub>30</sub> = 2.5</b><br><b>P &lt; 0.05</b>       | <b>T<sub>30</sub> = 4.5</b><br><b>P &lt; 0.0001</b> | <b>T<sub>30</sub> = 2.4</b><br><b>P &lt; 0.05</b>         | T <sub>30</sub> = 0.41<br>P > 0.05                  |
|                                   | Test 2 (T <sub>2</sub> ) | ED | F <sub>(1,43)</sub> = 1.9<br>P = 0.18                    | <b>F<sub>(1,43)</sub> = 4.4</b><br><b>P &lt; 0.05</b>    | <b>F<sub>(1,43)</sub> = 6.2</b><br><b>P &lt; 0.05</b>  | <b>T<sub>22</sub> = 2.8</b><br><b>P &lt; 0.05</b>       | T <sub>21</sub> = 0.8<br>P > 0.05                   | T <sub>22</sub> = 0.3<br>P > 0.05                         | <b>T<sub>21</sub> = 3.2</b><br><b>P &lt; 0.01</b>   |
|                                   |                          | YA | <b>F<sub>(1,54)</sub> = 15.6</b><br><b>P = 0.0002</b>    | F <sub>(1,54)</sub> = 0.51<br>P = 0.48                   | F <sub>(1,54)</sub> = 0.06<br>P = 0.80                 | T <sub>24</sub> = 2.3<br>P > 0.05                       | <b>T<sub>21</sub> = 3.6</b><br><b>P &lt; 0.01</b>   | T <sub>22</sub> = 0.72<br>P > 0.05                        | T <sub>23</sub> = 0.31<br>P > 0.05                  |
|                                   |                          | OA | <b>F<sub>(1,60)</sub> = 7.9</b><br><b>P &lt; 0.01</b>    | F <sub>(1,60)</sub> = 0.05<br>P = 0.82                   | F <sub>(1,60)</sub> = 2.8<br>P = 0.10                  | T <sub>30</sub> = 0.81<br>P > 0.05                      | <b>T<sub>30</sub> = 3.1</b><br><b>P &lt; 0.01</b>   | T <sub>30</sub> = 1.0<br>P > 0.05                         | T <sub>30</sub> = 1.3<br>P > 0.05                   |
| Female                            | Test 1 (T <sub>1</sub> ) | ED | <b>F<sub>(1,60)</sub> = 6.8</b><br><b>P &lt; 0.05</b>    | <b>F<sub>(1,60)</sub> = 27.6</b><br><b>P &lt; 0.0001</b> | F <sub>(1,60)</sub> = 2.4<br>P = 0.12                  | <b>T<sub>30</sub> = 2.9</b><br><b>P &lt; 0.01</b>       | T <sub>30</sub> = 0.7<br>P > 0.05                   | <b>T<sub>30</sub> = 2.6</b><br><b>P &lt; 0.05</b>         | <b>T<sub>30</sub> = 4.8</b><br><b>P &lt; 0.0001</b> |
|                                   |                          | YA | <b>F<sub>(1,60)</sub> = 21.3</b><br><b>P &lt; 0.0001</b> | <b>F<sub>(1,60)</sub> = 14.9</b><br><b>P &lt; 0.001</b>  | F <sub>(1,60)</sub> = 0.49<br>P = 0.49                 | <b>T<sub>30</sub> = 3.8</b><br><b>P &lt; 0.001</b>      | <b>T<sub>29</sub> = 2.8</b><br><b>P &lt; 0.05</b>   | T <sub>30</sub> = 2.2<br>P > 0.05                         | <b>T<sub>29</sub> = 3.2</b><br><b>P &lt; 0.01</b>   |
|                                   |                          | OA | <b>F<sub>(1,60)</sub> = 26.5</b><br><b>P &lt; 0.0001</b> | F <sub>(1,60)</sub> = 0.02<br>P = 0.89                   | F <sub>(1,60)</sub> = 2.5<br>P = 0.12                  | <b>T<sub>30</sub> = 2.5</b><br><b>P &lt; 0.05</b>       | <b>T<sub>30</sub> = 4.8</b><br><b>P &lt; 0.0001</b> | T <sub>30</sub> = 1.0<br>P > 0.05                         | T <sub>30</sub> = 1.2<br>P > 0.05                   |
|                                   | Test 2 (T <sub>2</sub> ) | ED | <b>F<sub>(1,55)</sub> = 10.3</b><br><b>P &lt; 0.005</b>  | F <sub>(1,55)</sub> = 1.7<br>P = 0.20                    | <b>F<sub>(1,55)</sub> = 9.3</b><br><b>P &lt; 0.005</b> | <b>T<sub>30</sub> = 4.6</b><br><b>P &lt; 0.0001</b>     | T <sub>25</sub> = 0.1<br>P > 0.05                   | T <sub>26</sub> = 1.2<br>P > 0.05                         | <b>T<sub>29</sub> = 3.2</b><br><b>P &lt; 0.01</b>   |
|                                   |                          | YA | <b>F<sub>(1,60)</sub> = 11.7</b><br><b>P &lt; 0.005</b>  | F <sub>(1,60)</sub> = 0.26<br>P = 0.61                   | F <sub>(1,60)</sub> = 0.25<br>P = 0.62                 | <b>T<sub>30</sub> = 2.8</b><br><b>P &lt; 0.05</b>       | T <sub>30</sub> = 2.1<br>P > 0.05                   | T <sub>30</sub> = 0.01<br>P > 0.05                        | T <sub>30</sub> = 0.71<br>P > 0.05                  |
|                                   |                          | OA | <b>F<sub>(1,60)</sub> = 9.5</b><br><b>P &lt; 0.005</b>   | F <sub>(1,60)</sub> = 2.3<br>P = 0.13                    | F <sub>(1,60)</sub> = 0.13<br>P = 0.72                 | <b>T<sub>30</sub> = 2.4</b><br><b>P &lt; 0.05</b>       | T <sub>30</sub> = 1.9<br>P > 0.05                   | T <sub>30</sub> = 1.3<br>P > 0.05                         | T <sub>30</sub> = 0.83<br>P > 0.05                  |

| Fig. 5a<br>BDNF ELISA<br>(Males + Females) |                          |    | Genotype Effects                                         | Treatment Effects                                        | Genotype X Treatment Interactions                     | Test 2 hoc Bonferroni Test Genotype Effects (WT vs KIV) |                                                      | Test 2 hoc Bonferroni Test Treatment Effects (SCT vs EET) |                                                     |
|--------------------------------------------|--------------------------|----|----------------------------------------------------------|----------------------------------------------------------|-------------------------------------------------------|---------------------------------------------------------|------------------------------------------------------|-----------------------------------------------------------|-----------------------------------------------------|
|                                            |                          |    |                                                          |                                                          |                                                       | SCT                                                     | EET                                                  | WT                                                        | KIV                                                 |
|                                            |                          |    |                                                          |                                                          |                                                       |                                                         |                                                      |                                                           |                                                     |
| Hippocampus                                | Test 1 (T <sub>1</sub> ) | ED | <b>F<sub>(1,35)</sub> = 9.0</b><br><b>P &lt; 0.005</b>   | <b>F<sub>(1,35)</sub> = 50.6</b><br><b>P &lt; 0.0001</b> | F <sub>(1,35)</sub> = 0.90<br>P = 0.35                | <b>T<sub>18</sub> = 2.8</b><br><b>P &lt; 0.05</b>       | T <sub>17</sub> = 1.4<br>P > 0.05                    | <b>T<sub>18</sub> = 4.4</b><br><b>P &lt; 0.001</b>        | <b>T<sub>17</sub> = 5.6</b><br><b>P &lt; 0.0001</b> |
|                                            |                          | YA | <b>F<sub>(1,28)</sub> = 90.5</b><br><b>P &lt; 0.0001</b> | <b>F<sub>(1,28)</sub> = 14.9</b><br><b>P &lt; 0.001</b>  | <b>F<sub>(1,28)</sub> = 4.5</b><br><b>P &lt; 0.05</b> | <b>T<sub>14</sub> = 5.22</b><br><b>P &lt; 0.0001</b>    | <b>T<sub>14</sub> = 8.23</b><br><b>P &lt; 0.0001</b> | <b>T<sub>14</sub> = 4.2</b><br><b>P &lt; 0.001</b>        | T <sub>14</sub> = 1.2<br>P > 0.05                   |
|                                            |                          | OA | <b>F<sub>(1,28)</sub> = 39.4</b><br><b>P &lt; 0.0001</b> | F <sub>(1,28)</sub> = 1.6<br>P = 0.21                    | F <sub>(1,28)</sub> = 3.0<br>P = 0.094                | <b>T<sub>14</sub> = 3.2</b><br><b>P &lt; 0.01</b>       | <b>T<sub>14</sub> = 5.7</b><br><b>P &lt; 0.0001</b>  | T <sub>14</sub> = 2.1<br>P > 0.05                         | T <sub>14</sub> = 0.33<br>P > 0.05                  |
|                                            | Test 2 (T <sub>2</sub> ) | ED | <b>F<sub>(1,34)</sub> = 50.3</b><br><b>P &lt; 0.0001</b> | <b>F<sub>(1,34)</sub> = 7.9</b><br><b>P &lt; 0.01</b>    | F <sub>(1,34)</sub> = 1.9<br>P = 0.18                 | <b>T<sub>16</sub> = 5.83</b><br><b>P &lt; 0.0001</b>    | <b>T<sub>18</sub> = 4.15</b><br><b>P &lt; 0.001</b>  | T <sub>17</sub> = 1.02<br>P > 0.05                        | <b>T<sub>17</sub> = 2.96</b><br><b>P &lt; 0.05</b>  |
|                                            |                          | YA | <b>F<sub>(1,30)</sub> = 51.4</b><br><b>P &lt; 0.0001</b> | F <sub>(1,30)</sub> = 0.55<br>P = 0.47                   | F <sub>(1,30)</sub> = 1.8<br>P = 0.19                 | <b>T<sub>14</sub> = 4.1</b><br><b>P &lt; 0.001</b>      | <b>T<sub>14</sub> = 6.0</b><br><b>P &lt; 0.0001</b>  | T <sub>14</sub> = 1.5<br>P > 0.05                         | T <sub>14</sub> = 0.42<br>P > 0.05                  |
|                                            |                          | OA | <b>F<sub>(1,28)</sub> = 12.4</b><br><b>P &lt; 0.005</b>  | F <sub>(1,28)</sub> = 0.35<br>P = 0.56                   | F <sub>(1,28)</sub> = 1.7<br>P = 0.20                 | <b>T<sub>14</sub> = 3.4</b><br><b>P &lt; 0.01</b>       | T <sub>14</sub> = 1.6<br>P > 0.05                    | T <sub>14</sub> = 1.3<br>P > 0.05                         | T <sub>14</sub> = 0.51<br>P > 0.05                  |
| Frontal Cortex                             | Test 1 (T <sub>1</sub> ) | ED | <b>F<sub>(1,36)</sub> = 17.3</b><br><b>P &lt; 0.005</b>  | <b>F<sub>(1,36)</sub> = 16.0</b><br><b>P &lt; 0.0005</b> | F <sub>(1,36)</sub> = 0.09<br>P = 0.77                | <b>T<sub>18</sub> = 3.2</b><br><b>P &lt; 0.01</b>       | <b>T<sub>18</sub> = 2.7</b><br><b>P &lt; 0.05</b>    | <b>T<sub>18</sub> = 2.6</b><br><b>P &lt; 0.05</b>         | <b>T<sub>18</sub> = 3.0</b><br><b>P &lt; 0.01</b>   |
|                                            |                          | YA | <b>F<sub>(1,29)</sub> = 27.4</b><br><b>P &lt; 0.0001</b> | F <sub>(1,29)</sub> = 2.1<br>P = 0.16                    | F <sub>(1,29)</sub> = 0.20<br>P = 0.66                | <b>T<sub>15</sub> = 3.4</b><br><b>P &lt; 0.01</b>       | <b>T<sub>14</sub> = 4.0</b><br><b>P &lt; 0.001</b>   | T <sub>15</sub> = 1.4<br>P > 0.05                         | T <sub>14</sub> = 0.70<br>P > 0.05                  |
|                                            |                          | OA | <b>F<sub>(1,28)</sub> = 6.3</b><br><b>P &lt; 0.05</b>    | F <sub>(1,28)</sub> = 0.35<br>P = 0.56                   | F <sub>(1,28)</sub> = 0.73<br>P = 0.40                | <b>T<sub>14</sub> = 2.4</b><br><b>P &lt; 0.05</b>       | T <sub>14</sub> = 1.2<br>P > 0.05                    | T <sub>14</sub> = 0.19<br>P > 0.05                        | T <sub>14</sub> = 1.0<br>P > 0.05                   |
|                                            | Test 2 (T <sub>2</sub> ) | ED | <b>F<sub>(1,36)</sub> = 41.5</b><br><b>P &lt; 0.0001</b> | F <sub>(1,36)</sub> = 0.90<br>P = 0.35                   | F <sub>(1,36)</sub> = 0.21<br>P = 0.65                | <b>T<sub>18</sub> = 4.2</b><br><b>P &lt; 0.001</b>      | <b>T<sub>18</sub> = 4.9</b><br><b>P &lt; 0.0001</b>  | T <sub>18</sub> = 1.00<br>P > 0.05                        | T <sub>18</sub> = 0.34<br>P > 0.05                  |
|                                            |                          | YA | <b>F<sub>(1,29)</sub> = 15.6</b><br><b>P &lt; 0.001</b>  | F <sub>(1,29)</sub> = 0.58<br>P = 0.45                   | F <sub>(1,29)</sub> = 0.13<br>P = 0.72                | <b>T<sub>15</sub> = 3.1</b><br><b>P &lt; 0.01</b>       | <b>T<sub>14</sub> = 2.5</b><br><b>P &lt; 0.05</b>    | T <sub>15</sub> = 0.29<br>P > 0.05                        | T <sub>14</sub> = 0.78<br>P > 0.05                  |
|                                            |                          | OA | F <sub>(1,28)</sub> = 3.9<br>P = 0.06                    | F <sub>(1,28)</sub> = 0.06<br>P = 0.81                   | F <sub>(1,28)</sub> = 0.23<br>P = 0.64                | T <sub>14</sub> = 1.7<br>P > 0.05                       | T <sub>14</sub> = 1.1<br>P > 0.05                    | T <sub>14</sub> = 0.17<br>P > 0.05                        | T <sub>14</sub> = 0.56<br>P > 0.05                  |

| Suppl. Fig. 1<br>OFT (Distance<br>Moved) |                          |    | Genotype<br>Effects                                      | Treatment<br>Effects                                     | Genotype X<br>Treatment<br>Interactions                  | Test 2 hoc Bonferroni Test<br>Genotype Effects (WT vs KIV) |                                                     | Test 2 hoc Bonferroni Test<br>Treatment Effects (SCT vs EET) |                                                   |
|------------------------------------------|--------------------------|----|----------------------------------------------------------|----------------------------------------------------------|----------------------------------------------------------|------------------------------------------------------------|-----------------------------------------------------|--------------------------------------------------------------|---------------------------------------------------|
|                                          |                          |    |                                                          |                                                          |                                                          | SCT                                                        | EET                                                 | WT                                                           | KIV                                               |
| Male                                     | Test 1 (T <sub>1</sub> ) | ED | <b>F<sub>(1,57)</sub> = 5.9</b><br><b>P &lt; 0.05</b>    | <b>F<sub>(1,57)</sub> = 6.4</b><br><b>P &lt; 0.05</b>    | F <sub>(1,57)</sub> = 0.8<br>P = 0.37                    | T <sub>30</sub> = 1.1<br>P > 0.05                          | T <sub>27</sub> = 2.3<br>P > 0.05                   | <b>T<sub>28</sub> = 2.4</b><br><b>P &lt; 0.05</b>            | T <sub>29</sub> = 1.2<br>P > 0.05                 |
|                                          |                          | YA | <b>F<sub>(1,52)</sub> = 12.3</b><br><b>P &lt; 0.001</b>  | <b>F<sub>(1,52)</sub> = 4.3</b><br><b>P &lt; 0.05</b>    | F <sub>(1,52)</sub> = 2.4<br>P = 0.13                    | T <sub>26</sub> = 1.4<br>P > 0.05                          | <b>T<sub>26</sub> = 3.6</b><br><b>P &lt; 0.01</b>   | <b>T<sub>24</sub> = 2.6</b><br><b>P &lt; 0.05</b>            | T <sub>26</sub> = 0.36<br>P > 0.05                |
|                                          |                          | OA | <b>F<sub>(1,60)</sub> = 23.2</b><br><b>P &lt; 0.0001</b> | F <sub>(1,60)</sub> = 0.07<br>P = 0.80                   | <b>F<sub>(1,60)</sub> = 15.7</b><br><b>P &lt; 0.001</b>  | T <sub>30</sub> = 0.61<br>P > 0.05                         | <b>T<sub>30</sub> = 6.2</b><br><b>P &lt; 0.0001</b> | <b>T<sub>30</sub> = 2.6</b><br><b>P &lt; 0.05</b>            | <b>T<sub>30</sub> = 3.0</b><br><b>P &lt; 0.01</b> |
|                                          | Test 2 (T <sub>2</sub> ) | ED | F <sub>(1,57)</sub> = 2.0<br>P = 0.16                    | F <sub>(1,57)</sub> = 0.7<br>P = 0.40                    | F <sub>(1,57)</sub> = 0.22<br>P = 0.64                   | T <sub>30</sub> = 1.4<br>P > 0.05                          | T <sub>27</sub> = 0.7<br>P > 0.05                   | T <sub>28</sub> = 0.3<br>P > 0.05                            | T <sub>29</sub> = 0.9<br>P > 0.05                 |
|                                          |                          | YA | <b>F<sub>(1,46)</sub> = 7.5</b><br><b>P &lt; 0.01</b>    | F <sub>(1,46)</sub> = 0.32<br>P = 0.57                   | F <sub>(1,46)</sub> = 0.01<br>P = 0.93                   | T <sub>25</sub> = 2.0<br>P > 0.05                          | T <sub>21</sub> = 1.9<br>P > 0.05                   | T <sub>22</sub> = 0.45<br>P > 0.05                           | T <sub>24</sub> = 0.35<br>P > 0.05                |
|                                          |                          | OA | F <sub>(1,60)</sub> = 1.1<br>P = 0.29                    | F <sub>(1,60)</sub> = 0.22<br>P = 0.64                   | F <sub>(1,60)</sub> = 0.23<br>P = 0.63                   | T <sub>30</sub> = 0.41<br>P > 0.05                         | T <sub>30</sub> = 1.1<br>P > 0.05                   | T <sub>30</sub> = 0.01<br>P > 0.05                           | T <sub>30</sub> = 0.66<br>P > 0.05                |
| Female                                   | Test 1 (T <sub>1</sub> ) | ED | <b>F<sub>(1,59)</sub> = 15.1</b><br><b>P &lt; 0.001</b>  | F <sub>(1,59)</sub> = 3.2<br>P = 0.08                    | <b>F<sub>(1,59)</sub> = 8.5</b><br><b>P &lt; 0.01</b>    | <b>T<sub>30</sub> = 4.8</b><br><b>P &lt; 0.0001</b>        | T <sub>29</sub> = 0.7<br>P > 0.05                   | <b>T<sub>30</sub> = 3.3</b><br><b>P &lt; 0.01</b>            | T <sub>29</sub> = 0.8<br>P > 0.05                 |
|                                          |                          | YA | <b>F<sub>(1,59)</sub> = 30.7</b><br><b>P &lt; 0.0001</b> | F <sub>(1,59)</sub> = 0.52<br>P = 0.47                   | F <sub>(1,59)</sub> = 0.88<br>P = 0.35                   | <b>T<sub>29</sub> = 3.2</b><br><b>P &lt; 0.01</b>          | <b>T<sub>30</sub> = 4.6</b><br><b>P &lt; 0.0001</b> | T <sub>30</sub> = 0.15<br>P > 0.05                           | T <sub>29</sub> = 1.2<br>P > 0.05                 |
|                                          |                          | OA | <b>F<sub>(1,60)</sub> = 36.4</b><br><b>P &lt; 0.0001</b> | F <sub>(1,60)</sub> = 0.01<br>P = 0.93                   | F <sub>(1,60)</sub> = 3.1<br>P = 0.08                    | <b>T<sub>30</sub> = 3.0</b><br><b>P &lt; 0.01</b>          | <b>T<sub>30</sub> = 5.5</b><br><b>P &lt; 0.0001</b> | T <sub>30</sub> = 1.3<br>P > 0.05                            | T <sub>30</sub> = 1.2<br>P > 0.05                 |
|                                          | Test 2 (T <sub>2</sub> ) | ED | <b>F<sub>(1,58)</sub> = 12.5</b><br><b>P &lt; 0.001</b>  | <b>F<sub>(1,58)</sub> = 24.2</b><br><b>P &lt; 0.0001</b> | <b>F<sub>(1,58)</sub> = 19.3</b><br><b>P &lt; 0.0001</b> | <b>T<sub>30</sub> = 5.7</b><br><b>P &lt; 0.0001</b>        | T <sub>28</sub> = 0.6<br>P > 0.05                   | <b>T<sub>28</sub> = 6.5</b><br><b>P &lt; 0.0001</b>          | T <sub>30</sub> = 0.4<br>P > 0.05                 |
|                                          |                          | YA | <b>F<sub>(1,60)</sub> = 9.9</b><br><b>P &lt; 0.01</b>    | F <sub>(1,60)</sub> = 0.16<br>P = 0.69                   | F <sub>(1,60)</sub> < 0.001<br>P = 0.98                  | T <sub>30</sub> = 2.2<br>P > 0.05                          | T <sub>30</sub> = 2.3<br>P > 0.05                   | T <sub>30</sub> = 0.30<br>P > 0.05                           | T <sub>30</sub> = 0.26<br>P > 0.05                |
|                                          |                          | OA | <b>F<sub>(1,60)</sub> = 8.1</b><br><b>P &lt; 0.01</b>    | <b>F<sub>(1,60)</sub> = 5.8</b><br><b>P &lt; 0.05</b>    | F <sub>(1,60)</sub> = 0.02<br>P = 0.90                   | T <sub>30</sub> = 2.1<br>P > 0.05                          | T <sub>30</sub> = 1.9<br>P > 0.05                   | T <sub>30</sub> = 1.6<br>P > 0.05                            | T <sub>30</sub> = 1.8<br>P > 0.05                 |

### 3. Two-way ANOVA: EET effects on genotype and ages

| Fig. 2b<br>OFT<br>Total<br>Activity |        | Genotype<br>Effects                 | Age<br>Effects                      | Genotype<br>X Age<br>Interacti<br>ons | <i>Test 2 hoc</i> Bonferroni Test Age Effects |                               |                               |                               |                               |                              | <i>Test 2 hoc</i> Bonferroni Test<br>Genotype Effects (WT vs<br>KIV) |                               |                               |
|-------------------------------------|--------|-------------------------------------|-------------------------------------|---------------------------------------|-----------------------------------------------|-------------------------------|-------------------------------|-------------------------------|-------------------------------|------------------------------|----------------------------------------------------------------------|-------------------------------|-------------------------------|
|                                     |        |                                     |                                     |                                       | ED vs YA                                      |                               | ED vs OA                      |                               | YA vs OA                      |                              | ED                                                                   | YA                            | OA                            |
|                                     |        |                                     |                                     |                                       | WT                                            | KIV                           | WT                            | KIV                           | WT                            | KIV                          |                                                                      |                               |                               |
| Male                                | Test 1 | $F_{(1, 83)} = 0.10$<br>$P = 0.75$  | $F_{(2, 83)} = 12.3$<br>$P < 0.001$ | $F_{(2, 83)} = 2.4$<br>$P = 0.10$     | $T_{26} = 1.3$<br>$P > 0.05$                  | $T_{28} = 1.6$<br>$P > 0.05$  | $T_{27} = 2.4$<br>$P > 0.05$  | $T_{30} = 4.9$<br>$P < 0.001$ | $T_{27} = 1.0$<br>$P > 0.05$  | $T_{28} = 3.2$<br>$P < 0.05$ | $T_{28} = 1.1$<br>$P > 0.05$                                         | $T_{26} = 0.95$<br>$P > 0.05$ | $T_{29} = 1.6$<br>$P > 0.05$  |
|                                     | Test 2 | $F_{(1, 78)} = 0.65$<br>$P = 0.42$  | $F_{(2, 78)} = 10.1$<br>$P < 0.001$ | $F_{(2, 78)} = 1.5$<br>$P = 0.22$     | $T_{22} = 0.24$<br>$P > 0.05$                 | $T_{26} = 2.2$<br>$P > 0.05$  | $T_{28} = 2.0$<br>$P > 0.05$  | $T_{30} = 4.4$<br>$P < 0.001$ | $T_{24} = 1.5$<br>$P > 0.05$  | $T_{26} = 1.9$<br>$P > 0.05$ | $T_{28} = 0.94$<br>$P > 0.05$                                        | $T_{21} = 0.90$<br>$P > 0.05$ | $T_{30} = 1.4$<br>$P > 0.05$  |
| Female                              | Test 1 | $F_{(1, 84)} = 5.1$<br>$P < 0.05$   | $F_{(2, 84)} = 2.6$<br>$P = 0.08$   | $F_{(2, 84)} = 2.6$<br>$P = 0.08$     | $T_{28} = 0.22$<br>$P > 0.05$                 | $T_{28} = 1.5$<br>$P > 0.05$  | $T_{27} = 0.01$<br>$P > 0.05$ | $T_{29} = 3.2$<br>$P < 0.05$  | $T_{27} = 0.21$<br>$P > 0.05$ | $T_{28} = 1.7$<br>$P > 0.05$ | $T_{28} = 2.8$<br>$P < 0.05$                                         | $T_{28} = 1.5$<br>$P > 0.05$  | $T_{28} = 0.40$<br>$P > 0.05$ |
|                                     | Test 2 | $F_{(1, 83)} = 14.4$<br>$P < 0.001$ | $F_{(2, 83)} = 1.5$<br>$P = 0.23$   | $F_{(2, 83)} = 3.0$<br>$P = 0.06$     | $T_{28} = 2.2$<br>$P > 0.05$                  | $T_{28} = 0.56$<br>$P > 0.05$ | $T_{13} = 1.2$<br>$P > 0.05$  | $T_{13} = 2.0$<br>$P > 0.05$  | $T_{13} = 0.97$<br>$P > 0.05$ | $T_{13} = 1.4$<br>$P > 0.05$ | $T_{27} = 4.1$<br>$P < 0.001$                                        | $T_{29} = 1.5$<br>$P > 0.05$  | $T_{28} = 0.98$<br>$P > 0.05$ |

| Fig. 3b<br>OFT<br>Time in<br>Center |        | Genotype<br>Effects                | Age<br>Effects                     | Genotype<br>X Age<br>Interacti<br>ons | <i>Test 2 hoc</i> Bonferroni Test Age Effects |                               |                               |                               |                               |                               | <i>Test 2 hoc</i> Bonferroni Test<br>Genotype Effects (WT vs<br>KIV) |                               |                               |
|-------------------------------------|--------|------------------------------------|------------------------------------|---------------------------------------|-----------------------------------------------|-------------------------------|-------------------------------|-------------------------------|-------------------------------|-------------------------------|----------------------------------------------------------------------|-------------------------------|-------------------------------|
|                                     |        |                                    |                                    |                                       | ED vs YA                                      |                               | ED vs OA                      |                               | YA vs OA                      |                               | ED                                                                   | YA                            | OA                            |
|                                     |        |                                    |                                    |                                       | WT                                            | KIV                           | WT                            | KIV                           | WT                            | KIV                           |                                                                      |                               |                               |
| Male                                | Test 1 | $F_{(1, 79)} = 4.0$<br>$P = 0.05$  | $F_{(2, 79)} = 0.90$<br>$P = 0.41$ | $F_{(2, 79)} = 0.77$<br>$P = 0.47$    | $T_{23} = 0.31$<br>$P > 0.05$                 | $T_{26} = 1.1$<br>$P > 0.05$  | $T_{28} = 0.16$<br>$P > 0.05$ | $T_{27} = 1.8$<br>$P > 0.05$  | $T_{25} = 0.47$<br>$P > 0.05$ | $T_{26} = 0.49$<br>$P > 0.05$ | $T_{28} = 0.17$<br>$P > 0.05$                                        | $T_{21} = 1.5$<br>$P > 0.05$  | $T_{30} = 1.8$<br>$P > 0.05$  |
|                                     | Test 2 | $F_{(1, 75)} = 4.6$<br>$P < 0.05$  | $F_{(2, 75)} = 0.92$<br>$P = 0.40$ | $F_{(2, 75)} = 1.8$<br>$P = 0.17$     | $T_{22} = 2.0$<br>$P > 0.05$                  | $T_{24} = 0.65$<br>$P > 0.05$ | $T_{27} = 1.8$<br>$P > 0.05$  | $T_{30} = 0.04$<br>$P > 0.05$ | $T_{23} = 0.38$<br>$P > 0.05$ | $T_{24} = 0.68$<br>$P > 0.05$ | $T_{28} = 2.9$<br>$P < 0.05$                                         | $T_{19} = 0.03$<br>$P > 0.05$ | $T_{29} = 1.2$<br>$P > 0.05$  |
| Female                              | Test 1 | $F_{(1, 87)} = 0.29$<br>$P = 0.59$ | $F_{(2, 87)} = 1.9$<br>$P = 0.15$  | $F_{(2, 87)} = 4.0$<br>$P < 0.05$     | $T_{30} = 0.53$<br>$P > 0.05$                 | $T_{27} = 3.4$<br>$P < 0.01$  | $T_{30} = 1.3$<br>$P > 0.05$  | $T_{29} = 1.9$<br>$P > 0.05$  | $T_{30} = 0.74$<br>$P > 0.05$ | $T_{27} = 1.6$<br>$P > 0.05$  | $T_{30} = 2.6$<br>$P < 0.05$                                         | $T_{27} = 1.1$<br>$P > 0.05$  | $T_{30} = 0.52$<br>$P > 0.05$ |
|                                     | Test 2 | $F_{(1, 86)} = 0.69$<br>$P = 0.41$ | $F_{(2, 86)} = 0.91$<br>$P = 0.41$ | $F_{(2, 86)} = 0.61$<br>$P = 0.55$    | $T_{26} = 1.7$<br>$P > 0.05$                  | $T_{30} = 0.16$<br>$P > 0.05$ | $T_{26} = 1.0$<br>$P > 0.05$  | $T_{30} = 0.28$<br>$P > 0.05$ | $T_{30} = 0.71$<br>$P > 0.05$ | $T_{30} = 0.11$<br>$P > 0.05$ | $T_{26} = 0.29$<br>$P > 0.05$                                        | $T_{30} = 1.3$<br>$P > 0.05$  | $T_{30} = 0.49$<br>$P > 0.05$ |

| Fig. 4b<br>TST<br>Immobility<br>Time |        | Genotype<br>Effects                | Age<br>Effects                     | Genotype<br>X Age<br>Interacti<br>ons | Test 2 hoc Bonferroni Test Age Effects |                              |                               |                              |                               |                               | Test 2 hoc Bonferroni Test<br>Genotype Effects (WT vs<br>KIV) |                               |                               |
|--------------------------------------|--------|------------------------------------|------------------------------------|---------------------------------------|----------------------------------------|------------------------------|-------------------------------|------------------------------|-------------------------------|-------------------------------|---------------------------------------------------------------|-------------------------------|-------------------------------|
|                                      |        |                                    |                                    |                                       | ED vs YA                               |                              | ED vs OA                      |                              | YA vs OA                      |                               | ED                                                            | YA                            | OA                            |
|                                      |        |                                    |                                    |                                       | WT                                     | KIV                          | WT                            | KIV                          | WT                            | KIV                           |                                                               |                               |                               |
| Male                                 | Test 1 | $F_{(1, 78)} = 0.05$<br>$P = 0.82$ | $F_{(2, 78)} = 2.8$<br>$P = 0.06$  | $F_{(2, 78)} = 3.6$<br>$P < 0.05$     | $T_{23} = 1.4$<br>$P > 0.05$           | $T_{24} = 2.2$<br>$P > 0.05$ | $T_{26} = 0.06$<br>$P > 0.05$ | $T_{26} = 3.1$<br>$P < 0.05$ | $T_{27} = 1.5$<br>$P > 0.05$  | $T_{28} = 0.89$<br>$P > 0.05$ | $T_{22} = 2.0$<br>$P > 0.05$                                  | $T_{25} = 1.6$<br>$P > 0.05$  | $T_{30} = 1.0$<br>$P > 0.05$  |
|                                      | Test 2 | $F_{(1, 72)} = 0.25$<br>$P = 0.62$ | $F_{(2, 72)} = 4.7$<br>$P < 0.05$  | $F_{(2, 72)} = 7.3$<br>$P < 0.001$    | $T_{21} = 2.1$<br>$P > 0.05$           | $T_{21} = 2.1$<br>$P > 0.05$ | $T_{26} = 0.6$<br>$P > 0.05$  | $T_{25} = 3.5$<br>$P < 0.01$ | $T_{25} = 1.6$<br>$P > 0.05$  | $T_{26} = 1.4$<br>$P > 0.05$  | $T_{22} = 2.8$<br>$P < 0.05$                                  | $T_{30} = 2.2$<br>$P > 0.05$  | $T_{30} = 1.6$<br>$P > 0.05$  |
| Female                               | Test 1 | $F_{(1, 90)} = 0.39$<br>$P = 0.53$ | $F_{(2, 90)} = 6.6$<br>$P < 0.005$ | $F_{(2, 90)} = 1.3$<br>$P = 0.27$     | $T_{29} = 1.0$<br>$P > 0.05$           | $T_{30} = 1.6$<br>$P > 0.05$ | $T_{29} = 1.5$<br>$P > 0.05$  | $T_{29} = 3.5$<br>$P < 0.01$ | $T_{30} = 0.40$<br>$P > 0.05$ | $T_{30} = 2.0$<br>$P > 0.05$  | $T_{29} = 1.2$<br>$P > 0.05$                                  | $T_{30} = 0.76$<br>$P > 0.05$ | $T_{30} = 0.95$<br>$P > 0.05$ |
|                                      | Test 2 | $F_{(1, 85)} = 6.3$<br>$P < 0.01$  | $F_{(2, 85)} = 2.4$<br>$P = 0.10$  | $F_{(2, 85)} = 4.1$<br>$P < 0.02$     | $T_{26} = 1.6$<br>$P > 0.05$           | $T_{29} = 2.2$<br>$P > 0.05$ | $T_{26} = 0.15$<br>$P > 0.05$ | $T_{29} = 3.1$<br>$P < 0.05$ | $T_{30} = 1.6$<br>$P > 0.05$  | $T_{30} = 0.92$<br>$P > 0.05$ | $T_{26} = 3.6$<br>$P < 0.01$                                  | $T_{34} = 0.05$<br>$P > 0.05$ | $T_{30} = 0.59$<br>$P > 0.05$ |

| Fig. 5b<br>BDNF levels |        | Genotype<br>Effects                  | Age<br>Effects                     | Genotype<br>X Age<br>Interacti<br>ons | Test 2 hoc Bonferroni Test Age Effects |                               |                              |                               |                               |                               | Test 2 hoc Bonferroni Test<br>Genotype Effects (WT vs<br>KIV) |                               |                                |
|------------------------|--------|--------------------------------------|------------------------------------|---------------------------------------|----------------------------------------|-------------------------------|------------------------------|-------------------------------|-------------------------------|-------------------------------|---------------------------------------------------------------|-------------------------------|--------------------------------|
|                        |        |                                      |                                    |                                       | ED vs YA                               |                               | ED vs OA                     |                               | YA vs OA                      |                               | ED                                                            | YA                            | OA                             |
|                        |        |                                      |                                    |                                       | WT                                     | KIV                           | WT                           | KIV                           | WT                            | KIV                           |                                                               |                               |                                |
| Hippocampus            | Test 1 | $F_{(1, 45)} = 0.0002$<br>$P = 0.99$ | $F_{(2, 45)} = 7.1$<br>$P < 0.005$ | $F_{(2, 45)} = 1.5$<br>$P = 0.23$     | $T_{16} = 0.67$<br>$P > 0.05$          | $T_{15} = 3.1$<br>$P < 0.05$  | $T_{16} = 1.9$<br>$P > 0.05$ | $T_{15} = 3.1$<br>$P < 0.05$  | $T_{14} = 1.2$<br>$P > 0.05$  | $T_{14} = 0.01$<br>$P > 0.05$ | $T_{17} = 1.3$<br>$P > 0.05$                                  | $T_{14} = 1.2$<br>$P > 0.05$  | $T_{14} < 0.001$<br>$P > 0.05$ |
|                        | Test 2 | $F_{(1, 46)} = 3.6$<br>$P = 0.06$    | $F_{(2, 46)} = 6.4$<br>$P < 0.005$ | $F_{(2, 46)} = 3.4$<br>$P < 0.05$     | $T_{16} = 0.48$<br>$P > 0.05$          | $T_{16} = 2.3$<br>$P > 0.05$  | $T_{15} = 3.0$<br>$P < 0.05$ | $T_{16} = 2.0$<br>$P > 0.05$  | $T_{13} = 3.3$<br>$P < 0.05$  | $T_{14} = 0.25$<br>$P > 0.05$ | $T_{18} = 2.0$<br>$P < 0.05$                                  | $T_{14} = 1.1$<br>$P > 0.05$  | $T_{13} = 1.9$<br>$P > 0.05$   |
| Frontal Cortex         | Test 1 | $F_{(1, 46)} = 0.30$<br>$P = 0.58$   | $F_{(2, 46)} = 6.0$<br>$P < 0.005$ | $F_{(2, 46)} = 0.62$<br>$P = 0.45$    | $T_{16} = 1.0$<br>$P > 0.05$           | $T_{15} = 2.6$<br>$P > 0.05$  | $T_{16} = 2.0$<br>$P > 0.05$ | $T_{16} = 2.6$<br>$P > 0.05$  | $T_{14} = 0.93$<br>$P > 0.05$ | $T_{13} = 0.03$<br>$P > 0.05$ | $T_{18} = 1.1$<br>$P > 0.05$                                  | $T_{13} = 0.61$<br>$P > 0.05$ | $T_{14} = 0.45$<br>$P > 0.05$  |
|                        | Test 2 | $F_{(1, 48)} = 0.02$<br>$P = 0.88$   | $F_{(2, 48)} = 0.72$<br>$P = 0.49$ | $F_{(2, 48)} = 0.42$<br>$P = 0.66$    | $T_{16} = 0.12$<br>$P > 0.05$          | $T_{15} = 0.26$<br>$P > 0.05$ | $T_{15} = 1.4$<br>$P > 0.05$ | $T_{15} = 0.28$<br>$P > 0.05$ | $T_{13} = 1.2$<br>$P > 0.05$  | $T_{12} = 0.03$<br>$P > 0.05$ | $T_{18} = 0.23$<br>$P > 0.05$                                 | $T_{13} = 0.22$<br>$P > 0.05$ | $T_{12} = 0.79$<br>$P > 0.05$  |

| Suppl. Fig. 1b<br>OFT<br>Distance Moved |        | Genotype Effects                    | Age Effects                         | Genotype X Age Interactions         | Test 2 hoc Bonferroni Test Age Effects |                               |                               |                               |                               |                               | Test 2 hoc Bonferroni Test Genotype Effects (WT vs KIV) |                               |                               |
|-----------------------------------------|--------|-------------------------------------|-------------------------------------|-------------------------------------|----------------------------------------|-------------------------------|-------------------------------|-------------------------------|-------------------------------|-------------------------------|---------------------------------------------------------|-------------------------------|-------------------------------|
|                                         |        |                                     |                                     |                                     | ED vs YA                               |                               | ED vs OA                      |                               | YA vs OA                      |                               | ED                                                      | YA                            | OA                            |
|                                         |        |                                     |                                     |                                     | WT                                     | KIV                           | WT                            | KIV                           | WT                            | KIV                           |                                                         |                               |                               |
| Male                                    | Test 1 | $F_{(1, 83)} = 19.7$<br>$P < 0.001$ | $F_{(2, 83)} = 4.8$<br>$P < 0.05$   | $F_{(2, 83)} = 3.2$<br>$P = 0.05$   | $T_{26} = 0.02$<br>$P > 0.05$          | $T_{27} = 0.87$<br>$P > 0.05$ | $T_{28} = 0.34$<br>$P > 0.05$ | $T_{30} = 3.8$<br>$P < 0.01$  | $T_{28} = 0.36$<br>$P > 0.05$ | $T_{28} = 2.9$<br>$P < 0.05$  | $T_{27} = 1.1$<br>$P > 0.05$                            | $T_{26} = 2.0$<br>$P > 0.05$  | $T_{30} = 4.7$<br>$P < 0.001$ |
|                                         | Test 2 | $F_{(1, 78)} = 0.26$<br>$P = 0.61$  | $F_{(2, 78)} = 2.6$<br>$P = 0.08$   | $F_{(2, 78)} = 1.6$<br>$P = 0.21$   | $T_{23} = 0.13$<br>$P > 0.05$          | $T_{25} = 0.64$<br>$P > 0.05$ | $T_{28} = 0.26$<br>$P > 0.05$ | $T_{29} = 2.8$<br>$P < 0.05$  | $T_{25} = 0.38$<br>$P > 0.05$ | $T_{26} = 2.0$<br>$P > 0.05$  | $T_{27} = 0.78$<br>$P > 0.05$                           | $T_{20} = 0.03$<br>$P > 0.05$ | $T_{30} = 1.7$<br>$P > 0.05$  |
| Female                                  | Test 1 | $F_{(1, 85)} = 0.08$<br>$P = 0.78$  | $F_{(2, 85)} = 0.87$<br>$P = 0.42$  | $F_{(2, 85)} = 13.8$<br>$P < 0.001$ | $T_{30} = 3.0$<br>$P < 0.05$           | $T_{29} = 3.3$<br>$P < 0.01$  | $T_{30} = 4.1$<br>$P < 0.001$ | $T_{30} = 2.6$<br>$P > 0.05$  | $T_{30} = 1.1$<br>$P > 0.05$  | $T_{30} = 0.79$<br>$P > 0.05$ | $T_{29} = 4.0$<br>$P < 0.001$                           | $T_{30} = 2.3$<br>$P > 0.05$  | $T_{30} = 2.6$<br>$P < 0.05$  |
|                                         | Test 2 | $F_{(1, 88)} = 3.5$<br>$P = 0.07$   | $F_{(2, 88)} = 14.4$<br>$P < 0.001$ | $F_{(2, 88)} = 9.3$<br>$P < 0.001$  | $T_{28} = 0.78$<br>$P > 0.05$          | $T_{30} = 0.83$<br>$P > 0.05$ | $T_{28} = 1.9$<br>$P > 0.05$  | $T_{30} = 0.55$<br>$P > 0.05$ | $T_{30} = 1.1$<br>$P > 0.05$  | $T_{30} = 0.29$<br>$P > 0.05$ | $T_{27} = 4.4$<br>$P < 0.001$                           | $T_{30} = 0.05$<br>$P > 0.05$ | $T_{30} = 1.4$<br>$P > 0.05$  |

**3. Student's *t*-test was conducted to compare data between two-groups.** This test was to verify the results of two-way ANOVA and to avoid type II errors. No major discrepancy was found.

| Fig. 2 OFT (Total Activity) |    |        | Genotype Effect (WT vs KIV) |                     | Treatment Effect (SCT vs EET) |                     |
|-----------------------------|----|--------|-----------------------------|---------------------|-------------------------------|---------------------|
|                             |    |        | SCT                         | EET                 | WT                            | KIV                 |
| Male                        | ED | Test 1 | <b>P &lt; 0.001</b>         | <b>P &lt; 0.001</b> | <b>P &lt; 0.001</b>           | <b>P &lt; 0.005</b> |
|                             |    | Test 2 | <b>P &lt; 0.001</b>         | <b>P &lt; 0.001</b> | <b>P &lt; 0.005</b>           | <b>P &lt; 0.01</b>  |
|                             | YA | Test 1 | <b>P &lt; 0.001</b>         | <b>P &lt; 0.001</b> | <b>P &lt; 0.005</b>           | <b>P &lt; 0.05</b>  |
|                             |    | Test 2 | <b>P &lt; 0.01</b>          | <b>P &lt; 0.001</b> | <b>P &lt; 0.005</b>           | P > 0.05            |
|                             | OA | Test 1 | <b>P &lt; 0.01</b>          | <b>P &lt; 0.005</b> | <b>P &lt; 0.05</b>            | P > 0.05            |
|                             |    | Test 2 | <b>P &lt; 0.005</b>         | <b>P &lt; 0.005</b> | P > 0.05                      | P > 0.05            |
| Female                      | ED | Test 1 | <b>P &lt; 0.001</b>         | P > 0.05            | <b>P &lt; 0.05</b>            | <b>P &lt; 0.001</b> |
|                             |    | Test 2 | <b>P &lt; 0.001</b>         | P > 0.05            | P > 0.05                      | <b>P &lt; 0.001</b> |
|                             | YA | Test 1 | <b>P &lt; 0.001</b>         | <b>P &lt; 0.005</b> | <b>P &lt; 0.05</b>            | <b>P &lt; 0.001</b> |
|                             |    | Test 2 | <b>P &lt; 0.001</b>         | <b>P &lt; 0.001</b> | <b>P &lt; 0.05</b>            | <b>P &lt; 0.01</b>  |
|                             | OA | Test 1 | <b>P &lt; 0.005</b>         | <b>P &lt; 0.005</b> | <b>P &lt; 0.005</b>           | P > 0.05            |
|                             |    | Test 2 | <b>P &lt; 0.005</b>         | <b>P &lt; 0.01</b>  | P > 0.05                      | P > 0.05            |

| Fig. 3 OFT (Time in Center) |    |        | Genotype Effect (WT vs KIV) |                     | Treatment Effect (SCT vs EET) |                    |
|-----------------------------|----|--------|-----------------------------|---------------------|-------------------------------|--------------------|
|                             |    |        | SCT                         | EET                 | WT                            | KIV                |
| Male                        | ED | Test 1 | P > 0.05                    | P > 0.05            | <b>P &lt; 0.01</b>            | <b>P &lt; 0.05</b> |
|                             |    | Test 2 | P > 0.05                    | <b>P &lt; 0.005</b> | <b>P &lt; 0.05</b>            | P > 0.05           |
|                             | YA | Test 1 | P > 0.05                    | <b>P &lt; 0.005</b> | <b>P &lt; 0.05</b>            | P > 0.05           |
|                             |    | Test 2 | P > 0.05 (0.059)            | P > 0.05            | P > 0.05                      | P > 0.05           |
|                             | OA | Test 1 | P > 0.05                    | <b>P &lt; 0.005</b> | <b>P &lt; 0.05</b>            | P > 0.05           |
|                             |    | Test 2 | P > 0.05                    | <b>P &lt; 0.005</b> | P > 0.05                      | P > 0.05           |
| Female                      | ED | Test 1 | P > 0.05 (0.070)            | P > 0.05            | P > 0.05                      | <b>P &lt; 0.01</b> |
|                             |    | Test 2 | P > 0.05                    | P > 0.05            | P > 0.05                      | P > 0.05           |
|                             | YA | Test 1 | P > 0.05                    | <b>P &lt; 0.01</b>  | P > 0.05                      | P > 0.05           |
|                             |    | Test 2 | P > 0.05                    | <b>P &lt; 0.005</b> | P > 0.05                      | P > 0.05           |
|                             | OA | Test 1 | <b>P &lt; 0.05</b>          | <b>P &lt; 0.005</b> | <b>P &lt; 0.005</b>           | P > 0.05           |
|                             |    | Test 2 | <b>P &lt; 0.05</b>          | <b>P &lt; 0.05</b>  | P > 0.05                      | P > 0.05           |

| Fig. 4 TST (Immobility Time) |    |        | Genotype Effect (WT vs KIV) |                     | Treatment Effect (SCT vs EET) |                     |
|------------------------------|----|--------|-----------------------------|---------------------|-------------------------------|---------------------|
|                              |    |        | SCT                         | EET                 | WT                            | KIV                 |
| Male                         | ED | Test 1 | <b>P &lt; 0.001</b>         | P > 0.05            | <b>P &lt; 0.005</b>           | <b>P &lt; 0.001</b> |
|                              |    | Test 2 | <b>P &lt; 0.001</b>         | P > 0.05            | P > 0.05                      | <b>P &lt; 0.05</b>  |
|                              | YA | Test 1 | <b>P &lt; 0.001</b>         | <b>P &lt; 0.005</b> | <b>P &lt; 0.05</b>            | <b>P &lt; 0.001</b> |
|                              |    | Test 2 | <b>P &lt; 0.01</b>          | <b>P &lt; 0.01</b>  | P > 0.05 (0.072)              | P > 0.05            |
|                              | OA | Test 1 | <b>P &lt; 0.05</b>          | <b>P &lt; 0.005</b> | <b>P &lt; 0.05</b>            | P > 0.05            |
|                              |    | Test 2 | P > 0.05                    | <b>P &lt; 0.005</b> | P > 0.05                      | P > 0.05            |
| Female                       | ED | Test 1 | <b>P &lt; 0.005</b>         | P > 0.05            | <b>P &lt; 0.01</b>            | <b>P &lt; 0.001</b> |
|                              |    | Test 2 | <b>P &lt; 0.001</b>         | P > 0.05            | P > 0.05                      | <b>P &lt; 0.05</b>  |
|                              | YA | Test 1 | <b>P &lt; 0.001</b>         | <b>P &lt; 0.05</b>  | <b>P &lt; 0.05</b>            | <b>P &lt; 0.01</b>  |
|                              |    | Test 2 | <b>P &lt; 0.01</b>          | P > 0.05 (0.053)    | P > 0.05                      | P > 0.05            |
|                              | OA | Test 1 | <b>P &lt; 0.05</b>          | <b>P &lt; 0.005</b> | P > 0.05                      | P > 0.05            |
|                              |    | Test 2 | <b>P &lt; 0.05</b>          | P > 0.05            | P > 0.05                      | P > 0.05            |



| Fig. 5 BDNF levels |    |        | Genotype Effect (WT vs KIV) |                     | Treatment Effect (SCT vs EET) |                     |
|--------------------|----|--------|-----------------------------|---------------------|-------------------------------|---------------------|
|                    |    |        | SCT                         | EET                 | WT                            | KIV                 |
| Hippocampus        | ED | Test 1 | <b>P &lt; 0.001</b>         | P > 0.05            | <b>P &lt; 0.001</b>           | <b>P &lt; 0.001</b> |
|                    |    | Test 2 | <b>P &lt; 0.001</b>         | <b>P &lt; 0.001</b> | P > 0.05                      | <b>P &lt; 0.005</b> |
|                    | YA | Test 1 | <b>P &lt; 0.001</b>         | <b>P &lt; 0.001</b> | <b>P &lt; 0.005</b>           | P > 0.05            |
|                    |    | Test 2 | <b>P &lt; 0.001</b>         | <b>P &lt; 0.001</b> | P > 0.05                      | P > 0.05            |
|                    | OA | Test 1 | <b>P &lt; 0.001</b>         | <b>P &lt; 0.001</b> | P > 0.05                      | P > 0.05            |
|                    |    | Test 2 | <b>P &lt; 0.01</b>          | P > 0.05            | P > 0.05                      | P > 0.05            |
| Frontal Cortex     | ED | Test 1 | <b>P &lt; 0.001</b>         | <b>P &lt; 0.05</b>  | <b>P &lt; 0.05</b>            | <b>P &lt; 0.005</b> |
|                    |    | Test 2 | <b>P &lt; 0.001</b>         | <b>P &lt; 0.001</b> | P > 0.05                      | P > 0.05            |
|                    | YA | Test 1 | <b>P &lt; 0.005</b>         | <b>P &lt; 0.001</b> | P > 0.05                      | P > 0.05            |
|                    |    | Test 2 | <b>P &lt; 0.005</b>         | <b>P &lt; 0.05</b>  | P > 0.05                      | P > 0.05            |
|                    | OA | Test 1 | <b>P &lt; 0.01</b>          | P > 0.05            | P > 0.05                      | P > 0.05            |
|                    |    | Test 2 | P > 0.05                    | P > 0.05            | P > 0.05                      | P > 0.05            |

| Supplementary Fig. 1<br>OFT (Distance Moved) |    |        | Genotype Effect (WT vs KIV) |                     | Treatment Effect (SCT vs EET) |                    |
|----------------------------------------------|----|--------|-----------------------------|---------------------|-------------------------------|--------------------|
|                                              |    |        | SCT                         | EET                 | WT                            | KIV                |
| Male                                         | ED | Test 1 | P > 0.05                    | <b>P &lt; 0.05</b>  | <b>P &lt; 0.05</b>            | P > 0.05           |
|                                              |    | Test 2 | P > 0.05                    | P > 0.05            | P > 0.05                      | P > 0.05           |
|                                              | YA | Test 1 | P > 0.05                    | <b>P &lt; 0.005</b> | <b>P &lt; 0.05</b>            | P > 0.05           |
|                                              |    | Test 2 | <b>P &lt; 0.05</b>          | P > 0.05            | P > 0.05                      | P > 0.05           |
|                                              | OA | Test 1 | P > 0.05                    | <b>P &lt; 0.005</b> | <b>P &lt; 0.05</b>            | P > 0.05           |
|                                              |    | Test 2 | P > 0.05                    | P > 0.05            | <b>P &lt; 0.005</b>           | P > 0.05           |
| Female                                       | ED | Test 1 | <b>P &lt; 0.001</b>         | P > 0.05            | <b>P &lt; 0.01</b>            | P > 0.05           |
|                                              |    | Test 2 | <b>P &lt; 0.001</b>         | P > 0.05            | <b>P &lt; 0.001</b>           | P > 0.05           |
|                                              | YA | Test 1 | <b>P &lt; 0.005</b>         | <b>P &lt; 0.01</b>  | P > 0.05                      | P > 0.05           |
|                                              |    | Test 2 | <b>P &lt; 0.05</b>          | <b>P &lt; 0.05</b>  | P > 0.05                      | P > 0.05           |
|                                              | OA | Test 1 | <b>P &lt; 0.01</b>          | <b>P &lt; 0.005</b> | P > 0.05                      | P > 0.05           |
|                                              |    | Test 2 | <b>P &lt; 0.05</b>          | P > 0.05            | P > 0.05                      | <b>P &lt; 0.05</b> |
